# Supplementary material
Source: PubMed Central journal article supplement (PMC3607362)
Supplement: NIHMS52467-supplement-01.pdf [file NIHMS52467-supplement-01.pdf]

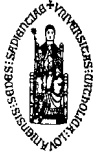

**EXPANDED METHODS and DATA SUPPLEMENT**  
**Risk Stratification by 24-Hour Ambulatory Blood Pressure and**  
**Estimated Glomerular Filtration Rate in 5322 Subjects from 11 Populations**

Short title: Risk Stratification by ABP and eGFR

José Boggia, Lutgarde Thijs, Yan Li, Tine W. Hansen, Masahiro Kikuya,  
Kristina Björklund-Bodegård, Takayoshi Ohkubo, Jørgen Jeppesen, Christian Torp-Pedersen,  
Eamon Dolan, Tatiana Kuznetsova, Katarzyna Stolarz-Skrzypek, Valérie Tikhonoff,  
Sofia Malyutina, Edoardo Casiglia, Yuri Nikitin, Lars Lind, Emma Schwedt, Edgardo Sandoya,  
Kalina Kawecka-Jaszcz, Jan Filipovský, Yutaka Imai, Jiguang Wang, Hans Ibsen, Eoin O'Brien,  
Jan A. Staessen, on behalf of the International Database on Ambulatory blood pressure  
in relation to Cardiovascular Outcomes (IDACO) Investigators

Word Count: 2390

Number of Tables 4

**Correspondence to:**

Jan A. Staessen, MD, PhD, FESC, FAHA,  
Studies Coordinating Centre,  
Laboratory of Hypertension,  
University of Leuven,  
Campus Sint Rafaël,  
Kapucijnenvoer 35, Block D, Box 7001,  
BE-3000 Leuven, Belgium

Telephone: +32-16-34-7104 (office)  
+32-15-41-1747 (home)  
+32-47-632-4928 (mobile)  
Facsimile: +32-16-34-7106 (office)  
+32-15-41-4542 (home)

email: [jan.staessen@med.kuleuven.be](mailto:jan.staessen@med.kuleuven.be)  
[ja.staessen@maastrichtuniversity.nl](mailto:ja.staessen@maastrichtuniversity.nl)

The Departamento de Fisiopatología, Hospital de Clínicas, Universidad de la República, Montevideo, Uruguay (J.B.); Studies Coordinating Centre, Division of Hypertension and Cardiovascular Rehabilitation, Department of Cardiovascular Sciences, University of Leuven, Belgium (Y.L., L.T., T.K., J.A.S.); Center for Epidemiological Studies and Clinical Trials (Y.L., J.W.) and Center for Vascular Evaluation (Y.L.), Ruijin Hospital, Shanghai Jiaotong University School of Medicine, Shanghai, China; Research Center for Prevention and Health and Department of Clinical Physiology, Hvidovre University Hospital, Faculty of Health Sciences, Copenhagen, Denmark (T.W.H.); the Tohoku University Graduate School of Pharmaceutical Science and Medicine, Sendai, Japan (M.K., T.O., Y.I.); the Section of Geriatrics, Department of Public Health and Caring Sciences, Uppsala University, Uppsala, Sweden (K.B.B., L.L.); the Copenhagen University Hospital, Copenhagen, Denmark (J.J., C.T.P.); Cambridge University Hospitals, Addenbrook's Hospital, Cambridge, United Kingdom (E.D.); First Department of Cardiology and Hypertension, Jagiellonian University Medical College, Kraków, Poland (K.S.S., K.K.J); Department of Clinical and Experimental Medicine, University of Padova, Padova, Italy (V.T., E.C.); Institute of Internal Medicine, Novosibirsk, Russian Federation (T.K., S.M.); the Asociación Española Primera de Socorros Mutuos, Montevideo, Uruguay (E.S., E.S.); Faculty of Medicine, Charles University, Pilsen, Czech Republic (J.F.); the Aarhus University and Division of Cardiology, Holbak Hospital, Holbak, Denmark (H.I.); the Conway Institute of Biomolecular and Biomedical Research, University College Dublin, Dublin, Ireland (E.O'B.); and the Department of Epidemiology, Maastricht University, Maastricht, The Netherlands (J.A.S.).

Correspondence to Dr Jan A. Staessen, Studies Coordinating Centre, Division of Hypertension and Cardiovascular Rehabilitation, Department of Cardiovascular Sciences, University of Leuven, Campus Sint Rafaël, Kapucijnenvoer, 35, Block D, Box 7001, BE-3000 Leuven, Belgium.  
E-mail: [jan.staessen@med.kuleuven.be](mailto:jan.staessen@med.kuleuven.be) or [ja.staessen@maastrichtuniversity.nl](mailto:ja.staessen@maastrichtuniversity.nl).

## Expanded Methods

### Study Population

As described in detail elsewhere,<sup>1</sup> we constructed the International Database on Ambulatory blood pressure monitoring in relation to Cardiovascular Outcomes (IDACO). Studies were eligible for inclusion, if they involved a random population sample, if baseline information on the ambulatory blood pressure and cardiovascular risk factors was available, and if the subsequent follow-up included both fatal and nonfatal outcomes.

The present study included 5322 participants: 190 residents from Copenhagen, Denmark;<sup>2</sup> 1072 subjects from Noorderkempen, Belgium;<sup>3</sup> 1040 older men from Uppsala, Sweden;<sup>4</sup> 241 subjects from Novosibirsk, the Russian Federation;<sup>5,6</sup> 185 inhabitants from Ohasama, Japan;<sup>7</sup> 346 villagers from the JingNing County, China;<sup>8</sup> 1082 subjects from Montevideo, Uruguay;<sup>9</sup> 165 from Pilsen, the Czech Republic;<sup>6</sup> 394 from Dublin, Ireland;<sup>10</sup> 306 from Padova, Italy;<sup>6</sup> and 301 from Kraków, Poland.<sup>6</sup> All participants gave informed written consent. Subjects recruited in Kraków, Novosibirsk, Pilsen, and Padova took part in the European Project on Genes in Hypertension (EPOGH).<sup>6</sup>

### Blood Pressure Measurements

Conventional blood pressure was measured by trained observers with a mercury sphygmomanometer,<sup>2,6,8,10</sup> with validated auscultatory<sup>7</sup> (USM-700F, UEDA Electronic Works, Tokyo, Japan) or oscillometric<sup>9</sup> (OMRON HEM-705CP, Omron Corporation, Tokyo, Japan) devices, using the appropriate cuff size, with participants in the sitting<sup>2,3,5-10</sup> or supine<sup>4</sup> position. Conventional blood pressure was the average of 2 consecutive readings obtained either at the person's home<sup>3,5,6,8,9</sup> or at an examination center.<sup>2,4,7,10</sup> Office hypertension was a conventional blood pressure of at least 140 mm Hg systolic or 90 mm Hg diastolic or the use of antihypertensive drugs.<sup>11</sup> We programmed portable monitors to obtain ambulatory blood pressure readings at 30 minute intervals throughout the whole day,<sup>7,10</sup> or at intervals ranging from 15<sup>2</sup> to 30<sup>4</sup> minutes during daytime and from 30<sup>2</sup> to 60<sup>4</sup> minutes at night. The devices implemented an auscultatory algorithm (Accutracker II) in Uppsala<sup>4</sup> or an oscillometric technique (SpaceLabs 90202 and 90207, Nippon Colin, and ABPM 630) in the other cohorts.<sup>3-10</sup>

The same SAS macro processed all ambulatory recordings, which generally stayed unedited. The Ohasama recordings were edited sparsely according to previously published criteria.<sup>12</sup> Within individual subjects, we weighted the means of the ambulatory blood pressure by the interval between readings.

When accounting for the daily pattern of activities of the participants, we defined daytime as the interval ranging from 1000 h to 2000 h in people from Europe<sup>2-6,10</sup> and South America,<sup>9</sup> and from 0800 h to 1800 h in those from Asia.<sup>7,8</sup> The corresponding night-time intervals ranged from midnight to 0600 h<sup>2-6,9,10</sup> and from 2200 h to 0400 h.<sup>7,8</sup> These fixed intervals eliminate the transition periods in the morning and evening when blood pressure changes rapidly, resulting in daytime and night-time blood pressure levels that are within 1–2 mm Hg of the awake and asleep levels.<sup>8,13</sup>

### Assessment of Renal Function

To measure the serum creatinine concentration, all laboratories applied Jaffe's method<sup>14</sup> with the modifications described elsewhere<sup>15,16</sup> to overcome interferences and limitations. The samples were run on automated analyzers in certified laboratories that participated in external quality control programs. We used the Chronic Kidney Disease Epidemiology Collaboration equation (CKD-EPI)<sup>17</sup> to estimate the glomerular filtration rate (eGFR) from sex, age, and the serum creatinine concentration. In a subsample of 2962 participants (55.7%), we checked the presence of proteinuria by means of a semi-quantitative dipstick method ( $n=1287$ )<sup>3,5-7</sup> or by measurement of albumin in a 24-h urine collection ( $n=1675$ ).<sup>3,9</sup> Proteinuria was a positive dipstick test (any degree of proteinuria) or a 24-h urinary albumin excretion of 30 mg or more.<sup>18</sup>

**Calculation of the R<sup>2</sup> statistic**

As proposed by Gillespie,<sup>19</sup> we applied the generalized R<sup>2</sup> statistic to assess the refinement in risk prediction by adding the 24-h blood pressure or eGFR to Cox models on top of other covariables. The formula for the calculation of R<sup>2</sup> is:

$$R^2 = 1 - \exp\left\{\frac{-2}{n}(\ln L(X_2) - \ln L(X_1))\right\} = 1 - \exp\left\{\frac{-\chi^2}{n}\right\}$$

where  $\ln L(X_2)$  and  $\ln L(X_1)$  are the log likelihood statistics of the extended and the nested reference model.

## References

1. Thijs L, Hansen TW, Kikuya M, Björklund-Bodegård K, Li Y, Dolan E, Tikhonoff V, Sleidlerová J, Kuznetsova T, Stolarz K, Bianchi M, Richart T, Casiglia E, Malyutina S, Filipovský J, Kawecka-Jaszcz K, Nikitin Y, Ohkubo T, Sandoya E, Wang JG, Torp-Pedersen C, Lind L, Ibsen H, Imai Y, Staessen JA, on behalf of the IDACO Investigators. The International Database of Ambulatory blood pressure in relation to Cardiovascular Outcome (IDACO): protocol and research perspectives. *Blood Press Monit.* 2007;12:255–262.
2. Hansen TW, Jeppesen J, Rasmussen S, Ibsen H, Torp-Pedersen C. Ambulatory blood pressure and risk of cardiovascular disease : a population based study. *Am J Hypertens.* 2006;19:243–250.
3. Staessen JA, Bieniaszewski L, O'Brien ET, Imai Y, Fagard R. An epidemiological approach to ambulatory blood pressure monitoring : the Belgian population study. *Blood Press Monit.* 1996;1:13–26.
4. Ingelsson E, Björklund K, Lind L, Ärnlöv J, Sundström J. Diurnal blood pressure pattern and risk of congestive heart failure. *JAMA.* 2006;295:2859–2866.
5. Kuznetsova T, Malyutina S, Pello E, Thijs L, Nikitin Y, Staessen JA. Ambulatory blood pressure of adults in Novosibirsk, Russia: interim report on a population study. *Blood Press Monit.* 2000;5:291–296.
6. Kuznetsova T, Staessen JA, Kawecka-Jaszcz K, Babeanu S, Casiglia E, Filipovský J, Nachev C, Nikitin Y, Peleská J, O'Brien E, on behalf of the EPOGH Investigators. Quality control of the blood pressure phenotype in the European Project on Genes in Hypertension. *Blood Press Monit.* 2002;7:215–224.
7. Ohkubo T, Hozawa A, Yamaguchi J, Kikuya M, Ohmori K, Michimata M, Matsubara M, Hashimoto J, Hoshi H, Araki T, Tsuji I, Satoh H, Hisamichi S, Imai Y. Prognostic significance of the nocturnal decline in blood pressure in individuals with and without high 24-h blood pressure : the Ohasama study. *J Hypertens.* 2002;20:2183–2189.
8. Li Y, Wang JG, Gao HF, Nawrot T, Wang GL, Qian YS, Staessen JA, Zhu DL. Are published characteristics of the ambulatory blood pressure generalizable to rural Chinese? The JingNing population study. *Blood Press Monit.* 2005;10:125–134.
9. Schettini C, Bianchi M, Nieto F, Sandoya E, Senra H, Hypertension Working Group. Ambulatory blood pressure. Normality and comparison with other measurements. *Hypertension.* 1999;34 (part 2):818–825.
10. O'Brien E, Murphy J, Tyndall A, Atkins N, Mee F, McCarthy G, Staessen J, Cox J, O'Malley K. Twenty-four-hour ambulatory blood pressure in men and women aged 17 to 80 years : the Allied Irish Bank Study. *J Hypertens.* 1991;9:355–360.
11. Mancia G, De BG, Dominiczak A, Cifkova R, Fagard R, Germano G, Grassi G, Heagerty AM, Kjeldsen SE, Laurent S, Narkiewicz K, Ruilope L, Rynkiewicz A, Schmieder RE, Boudier HA, Zanchetti A. 2007 ESH-ESC practice Guidelines for the Management of Arterial Hypertension: ESH-ESC Task Force on the Management of Arterial Hypertension. *J Hypertens.* 2007;25:1751–1762.
12. Ohkubo T, Imai Y, Tsuji I, Nagai K, Ito S, Satoh H, Hisamichi S. Reference values for 24-hour ambulatory blood pressure monitoring based on a prognostic criterion. The Ohasama Study. *Hypertension.* 1998;32:255–259.
13. Fagard R, Brguljan J, Thijs L, Staessen J. Prediction of the actual awake and asleep blood pressures by various methods of 24 h pressure analysis. *J Hypertens.* 1996;14:557–563.
14. Jaffe M. Über den Niederschlag, welchen Pikrinsäure in normalem Harn erzeugt und über eine neue Reaction des Kreatinins. *Z Physiol Chem.* 1886;10:391–400.
15. Bowers LD, Wong ET. Kinetic serum creatinine assays. II. A critical evaluation and review. *Clin Chem.* 1980;26:555–561.
16. Peake M, Whiting M. Measurement of serum creatinine — Current status and future goals. *Clin Biochem Rev.* 2006;27:173–182.
17. Levey AS, Stevens LA, Schmid CH, Zhang Y, Castro AF, III, Feldman HI, Kusek JW, Eggers P, Van Lente F, Greene T, Coresh J, for the CKD-EPI (Chronic Kidney Disease Epidemiology

- Collaboration). A new equation to estimate glomerular filtration rate. *Ann Intern Med*. 2009;150:604–612.
18. National Kidney Foundation. K/DOQI clinical practice guidelines for chronic kidney disease: evaluation, classification, and stratification. *Am J Kidney Dis*. 2002;39 (Suppl. 1):S1-S266.
  19. Gillespie BW. Use of generalized R-squared in Cox regression. APHA Scientific Session and Event Listing 2006. ([http://apha.confex.com/apha/134am/techprogram/paper\\_135906.htm](http://apha.confex.com/apha/134am/techprogram/paper_135906.htm), accessed August 15, 2012).

**Table S1:** Cohort- and Sex-Specific Quantiles of Serum Creatinine (mg/dl)

| Center        | Women |      |      |      |      |      | Men  |      |      |      |      |      |
|---------------|-------|------|------|------|------|------|------|------|------|------|------|------|
|               | N     | P10  | P25  | P50  | P75  | P90  | N    | P10  | P25  | P50  | P75  | P90  |
| Copenhagen    | 99    | 0.68 | 0.73 | 0.79 | 0.90 | 1.02 | 91   | 0.90 | 0.96 | 1.02 | 1.13 | 1.24 |
| Ohasama       | 136   | 0.70 | 0.70 | 0.80 | 0.90 | 0.90 | 49   | 0.70 | 0.90 | 1.00 | 1.05 | 1.20 |
| Noorderkempen | 539   | 0.75 | 0.80 | 0.90 | 1.00 | 1.11 | 533  | 0.93 | 1.01 | 1.10 | 1.21 | 1.31 |
| Uppsala       | ...   | ...  | ...  | ...  | ...  | ...  | 1040 | 0.89 | 0.95 | 1.03 | 1.13 | 1.21 |
| Montevideo    | 610   | 0.77 | 0.83 | 0.92 | 1.05 | 1.15 | 472  | 0.93 | 1.02 | 1.14 | 1.26 | 1.38 |
| JingNing      | 188   | 0.85 | 0.89 | 0.95 | 1.02 | 1.07 | 158  | 0.97 | 1.04 | 1.11 | 1.20 | 1.28 |
| Novosibirsk   | 136   | 0.77 | 0.83 | 0.90 | 1.00 | 1.09 | 105  | 0.89 | 0.97 | 1.03 | 1.12 | 1.22 |
| Pilsen        | 90    | 0.77 | 0.84 | 0.89 | 0.96 | 1.05 | 75   | 0.93 | 0.97 | 1.05 | 1.12 | 1.20 |
| Dublin        | 158   | 0.76 | 0.82 | 0.90 | 0.95 | 1.01 | 236  | 0.89 | 0.99 | 1.08 | 1.16 | 1.24 |
| Padova        | 172   | 0.70 | 0.70 | 0.80 | 0.80 | 0.90 | 134  | 0.80 | 0.90 | 0.99 | 1.05 | 1.10 |
| Kraków        | 165   | 0.64 | 0.74 | 0.84 | 0.96 | 1.04 | 136  | 0.79 | 0.86 | 0.95 | 1.09 | 1.17 |

N indicates the number of women or men. P10, P25, P50 P75 and P90 are the center and sex specific quantiles. An ellipsis indicates unavailable data.

**Table S2:** Cohort- and Sex-Specific quantiles of the Estimated Glomerular Filtration Rate (ml/min/1.73 m<sup>2</sup>)

| Center        | Women |      |      |      |       |       | Men  |       |      |       |       |       |
|---------------|-------|------|------|------|-------|-------|------|-------|------|-------|-------|-------|
|               | N     | P10  | P25  | P50  | P75   | P90   | N    | P10   | P25  | P50   | P75   | P90   |
| Copenhagen    | 99    | 60.0 | 69.1 | 81.0 | 81.7  | 95.4  | 91   | 62.5  | 69.9 | 79.4  | 80.0  | 91.9  |
| Ohasama       | 136   | 60.3 | 68.7 | 77.6 | 87.7  | 93.8  | 49   | 64.1  | 70.8 | 80.4  | 92.0  | 99.6  |
| Noorderkempen | 539   | 55.3 | 63.4 | 76.7 | 89.9  | 100.3 | 533  | 60.8  | 67.9 | 78.9  | 90.4  | 100.7 |
| Uppsala       | ...   | ...  | ...  | ...  | ...   | ...   | 1040 | 59.6  | 65.1 | 72.6  | 80.0  | 86.2  |
| Montevideo    | 610   | 50.7 | 59.9 | 72.0 | 85.1  | 95.4  | 472  | 54.36 | 63.4 | 75.0  | 88.3  | 99.6  |
| JingNing      | 188   | 58.8 | 65.2 | 71.8 | 80.1  | 87.7  | 158  | 60.2  | 70.0 | 78.8  | 90.3  | 95.3  |
| Novosibirsk   | 136   | 58.8 | 69.8 | 80.9 | 91.2  | 102.6 | 105  | 72.3  | 79.7 | 91.9  | 101.5 | 113.0 |
| Pilsen        | 90    | 65.5 | 71.3 | 83.6 | 93.4  | 98.4  | 75   | 68.3  | 80.0 | 91.5  | 100.1 | 112.3 |
| Dublin        | 158   | 70.8 | 76.5 | 84.9 | 95.0  | 105.5 | 236  | 70.3  | 78.3 | 87.0  | 96.2  | 108.5 |
| Padova        | 172   | 74.4 | 84.4 | 95.9 | 102.5 | 118.1 | 134  | 81.4  | 85.9 | 99.2  | 106.6 | 117.4 |
| Kraków        | 165   | 63.6 | 76.5 | 86.7 | 102.4 | 117.8 | 136  | 76.6  | 85.9 | 100.9 | 117.0 | 124.7 |

N indicates the number of women or men. P10, P25, P50 P75 and P90 are the center and sex specific quantiles. An ellipsis indicates unavailable data.



**Table S3.** Standardized Hazard Ratios in Relation to 24-h Diastolic Blood Pressure and Estimated Glomerular Filtration Rate in 5322 Participants

| Endpoint (number)                 | Model | 24-h Diastolic Pressure |          | 1/HR eGFR        |          |
|-----------------------------------|-------|-------------------------|----------|------------------|----------|
|                                   |       | Hazard Ratio            | <i>P</i> | Hazard ratio     | <i>P</i> |
| <b>Mortality</b>                  |       |                         |          |                  |          |
| All causes (513)                  | A     | 1.11 (1.02-1.22)        | 0.023    | 1.05 (0.91-1.20) | 0.50     |
|                                   | FA    | 1.11 (1.01-1.22)        | 0.024    | 1.05 (0.91-1.20) | 0.53     |
| Cardiovascular (206)              | A     | 1.32 (1.14-1.52)        | 0.0001   | 1.34 (1.07-1.67) | 0.012    |
|                                   | FA    | 1.31 (1.14-1.51)        | 0.0002   | 1.33 (1.06-1.66) | 0.014    |
| Noncardiovascular (275)           | A     | 0.99 (0.87-1.13)        | 0.90     | 0.89 (0.74-1.08) | 0.24     |
|                                   | FA    | 0.99 (0.87-1.13)        | 0.91     | 0.89 (0.74-1.08) | 0.24     |
| <b>Fatal Plus Nonfatal Events</b> |       |                         |          |                  |          |
| All cardiovascular (555)          | A     | 1.32 (1.22-1.44)        | <0.0001  | 1.15 (1.01-1.31) | 0.035    |
|                                   | FA    | 1.32 (1.22-1.44)        | <0.0001  | 1.14 (1.00-1.30) | 0.044    |
| Cardiac (335)                     | A     | 1.23 (1.10-1.37)        | 0.0002   | 1.08 (0.91-1.27) | 0.40     |
|                                   | FA    | 1.23 (1.10-1.37)        | 0.0002   | 1.07 (0.90-1.27) | 0.44     |
| Coronary (257)                    | A     | 1.15 (1.02-1.31)        | 0.025    | 1.07 (0.89-1.30) | 0.46     |
|                                   | FA    | 1.15 (1.02-1.31)        | 0.026    | 1.07 (0.89-1.29) | 0.48     |
| Stroke (218)                      | A     | 1.47 (1.29-1.68)        | <0.0001  | 1.33 (1.08-1.64) | 0.009    |
|                                   | FA    | 1.47 (1.29-1.68)        | <0.0001  | 1.33 (1.08-1.64) | 0.009    |

eGFR is the glomerular filtration rate estimated from the Chronic Kidney Disease Epidemiology Collaboration equation (CKD-EPI), as given in reference 17. Hazard ratios, presented with 95% confidence interval, express the risk associated with a 1-SD increase in 24-h diastolic blood pressure (8.3 mm Hg) or a 1-SD decrease in eGFR (16.7 ml/min/1.73 m<sup>2</sup>). For eGFR, the inverse of the hazard ratio is presented, so that higher values, associated with lower eGFR, reflect higher risk. All models were adjusted for center, sex, age, body mass index, smoking and drinking, serum cholesterol, diabetes mellitus, history of cardiovascular disease, and antihypertensive treatment. Adjusted models (A) include either the 24-h diastolic blood pressure or eGFR, while fully adjusted models (FA) include both 24-h diastolic blood pressure and eGFR in addition to the aforementioned covariables.

**Table S4.** Predictive Value of the Cox Regression models.

| Models                                                           | Cardiovascular mortality |          |                    | Cardiovascular events |          |                    | Stroke           |          |                    |
|------------------------------------------------------------------|--------------------------|----------|--------------------|-----------------------|----------|--------------------|------------------|----------|--------------------|
|                                                                  | Likelihood ratio         | <i>P</i> | R <sup>2</sup> (%) | Likelihood ratio      | <i>P</i> | R <sup>2</sup> (%) | Likelihood ratio | <i>P</i> | R <sup>2</sup> (%) |
| Basic model                                                      | 445.4                    | ...      | 8.03               | 809.7                 | ...      | 14.1               | 353.0            | ...      | 6.40               |
| 24-h diastolic pressure added to basic model                     | 14.0                     | 0.0001   | 0.26               | 41.2                  | <0.0001  | 0.77               | 30.5             | <0.0001  | 0.57               |
| eGFR added to basic model                                        | 6.4                      | 0.011    | 0.12               | 4.46                  | 0.035    | 0.08               | 7.0              | 0.009    | 0.13               |
| eGFR added to basic model also including 24-h diastolic pressure | 6.1                      | 0.0002   | 0.02 0             | 4.08                  | <0.0001  | -0.33              | 7.0              | <0.0001  | -0.30              |

The basic model included cohort, sex, age, body mass index, smoking and drinking, serum cholesterol, history of cardiovascular disease, diabetes mellitus, and treatment with antihypertensive drugs. *P*-values are for the improvement of the fit across nested models. Values are likelihood ratios and associated *P*-values and generalized R<sup>2</sup>-statistics for adding 24-hour diastolic blood pressure or eGFR to the reference model.

**Table S5.** Sensitivity Analyses for Cardiovascular Mortality in Relation to the 24-H Ambulatory Blood Pressure and eGFR Excluding One Center at a Time

| Center          | At risk | Events | 24-H Systolic Pressure |          | 1/HR eGFR         |          |
|-----------------|---------|--------|------------------------|----------|-------------------|----------|
|                 |         |        | Hazard ratio (CI)      | <i>P</i> | Hazard ratio (CI) | <i>P</i> |
| All centers     | 5322    | 206    | 1.33 (1.18–1.50)       | <0.0001  | 1.35 (1.07–1.69)  | 0.01     |
| Excluded center |         |        |                        |          |                   |          |
| Ohasama         | 5137    | 199    | 1.31 (1.15–1.48)       | <0.0001  | 1.37 (1.09–1.73)  | 0.007    |
| JingNing        | 4976    | 200    | 1.29 (1.13–1.46)       | <0.0001  | 1.35 (1.07–1.69)  | 0.011    |
| Copenhagen      | 5132    | 202    | 1.33 (1.18–1.51)       | <0.0001  | 1.34 (1.07–1.69)  | 0.012    |
| Dublin          | 4928    | 201    | 1.34 (1.18–1.51)       | <0.0001  | 1.32 (1.05–1.67)  | 0.017    |
| Noorderkempen   | 4250    | 161    | 1.26 (1.10–1.45)       | 0.0007   | 1.54 (1.18–1.99)  | 0.001    |
| Uppsala         | 4282    | 89     | 1.67 (1.37–2.05)       | <0.0001  | 1.41 (1.01–1.96)  | 0.045    |
| EPOGH           | 4309    | 200    | 1.31 (1.16–1.49)       | <0.0001  | 1.33 (1.06–1.67)  | 0.016    |
| Kraków          | 5021    | 204    | 1.33 (1.17–1.50)       | <0.0001  | 1.35 (1.07–1.69)  | 0.011    |
| Novosibirsk     | 5081    | 202    | 1.32 (1.16–1.49)       | <0.0001  | 1.34 (1.06–1.68)  | 0.013    |
| Padova          | 5016    | 206    | 1.33 (1.18–1.50)       | <0.0001  | 1.33 (1.06–1.67)  | 0.013    |
| Pilsen          | 5157    | 206    | 1.33 (1.18–1.50)       | <0.0001  | 1.35 (1.08–1.70)  | 0.010    |
| Montevideo      | 4240    | 190    | 1.34 (1.18–1.52)       | <0.0001  | 1.24 (0.97–1.57)  | 0.080    |

eGFR is the glomerular filtration rate estimated from the Chronic Kidney Disease Epidemiology Collaboration equation (CKD-EPI), as given in reference 17. Hazard ratios, presented with 95% confidence interval (CI), express the risk associated with a 1-SD increase in 24-h systolic blood pressure (14.2 mm Hg) or a 1-SD decrease in eGFR (16.7 ml/min/1.73 m<sup>2</sup>). For eGFR, the inverse of the hazard ratio is presented, so that higher values, associated with lower eGFR, reflect higher risk. All models were adjusted for center, sex, age, body mass index, smoking and drinking, serum cholesterol, diabetes mellitus, history of cardiovascular disease, and antihypertensive treatment and include both the 24-h systolic blood pressure or eGFR. EPOGH (European Project on Genes in Hypertension) includes participants recruited at Kraków, Novosibirsk, Padova and Pilsen.

**Table S6.** Sensitivity Analyses for All Cardiovascular Events in Relation to the 24-H Ambulatory Blood Pressure and eGFR Excluding one center at a time

| Center          | At risk | Events | 24-H Systolic Pressure |          | 1/HR eGFR         |          |
|-----------------|---------|--------|------------------------|----------|-------------------|----------|
|                 |         |        | Hazard ratio (CI)      | <i>P</i> | Hazard ratio (CI) | <i>P</i> |
| All centers     | 5322    | 555    | 1.37 (1.27–1.47)       | <0.0001  | 1.15 (1.01–1.32)  | 0.033    |
| Excluded center |         |        |                        |          |                   |          |
| Ohasama         | 5137    | 530    | 1.35 (1.25–1.45)       | <0.0001  | 1.17 (1.02–1.34)  | 0.027    |
| JingNing        | 4976    | 547    | 1.35 (1.25–1.46)       | <0.0001  | 1.15 (1.01–1.31)  | 0.040    |
| Copenhagen      | 5132    | 531    | 1.35 (1.26–1.46)       | <0.0001  | 1.16 (1.01–1.33)  | 0.033    |
| Dublin          | 4928    | 550    | 1.37 (1.27–1.47)       | <0.0001  | 1.15 (1.01–1.31)  | 0.041    |
| Noorderkempen   | 4250    | 465    | 1.36 (1.25–1.47)       | 0.0007   | 1.20 (1.03–1.38)  | 0.016    |
| Uppsala         | 4282    | 263    | 1.56 (1.38–1.77)       | <0.0001  | 1.02 (0.85–1.21)  | 0.82     |
| EPOGH           | 4309    | 523    | 1.36 (1.26–1.47)       | <0.0001  | 1.14 (0.99–1.31)  | 0.061    |
| Kraków          | 5021    | 550    | 1.37 (1.27–1.47)       | <0.0001  | 1.16 (1.01–1.32)  | 0.030    |
| Novosibirsk     | 5081    | 539    | 1.36 (1.26–1.47)       | <0.0001  | 1.13 (0.98–1.29)  | 0.085    |
| Padova          | 5016    | 545    | 1.36 (1.27–1.47)       | <0.0001  | 1.16 (1.01–1.32)  | 0.032    |
| Pilsen          | 5157    | 554    | 1.37 (1.27–1.48)       | <0.0001  | 1.16 (1.02–1.32)  | 0.029    |
| Montevideo      | 4240    | 476    | 1.36 (1.25–1.47)       | <0.0001  | 1.23 (1.06–1.43)  | 0.006    |

eGFR is the glomerular filtration rate estimated from the Chronic Kidney Disease Epidemiology Collaboration equation (CKD-EPI), as given in reference 17. Hazard ratios, presented with 95% confidence interval (CI), express the risk associated with a 1-SD increase in 24-h systolic blood pressure (14.2 mm Hg) or a 1-SD decrease in eGFR (16.7 ml/min/1.73 m<sup>2</sup>). For eGFR, the inverse of the hazard ratio is presented, so that higher values, associated with lower eGFR, reflect higher risk. All models were adjusted for center, sex, age, body mass index, smoking and drinking, serum cholesterol, diabetes mellitus, history of cardiovascular disease, and antihypertensive treatment and include both the 24-h systolic blood pressure or eGFR. EPOGH (European Project on Genes in Hypertension) includes participants recruited at Kraków, Novosibirsk, Padova and Pilsen.

**Table S7.** Sensitivity Analyses for Cardiovascular Mortality and All Cardiovascular Events in Relation to the 24-H Ambulatory Blood Pressure and eGFR in Participants with and without Proteinuria

| Endpoint                 | At risk | Events | 24-H Systolic Pressure |          | 1/HR eGFR         |          |
|--------------------------|---------|--------|------------------------|----------|-------------------|----------|
|                          |         |        | Hazard ratio (CI)      | <i>P</i> | Hazard ratio (CI) | <i>P</i> |
| Cardiovascular mortality |         |        |                        |          |                   |          |
| All                      | 2962    | 62     | 1.57 (1.25–1.97)       | 0.0001   | 1.28 (0.83–1.99)  | 0.27     |
| Without proteinuria      | 2716    | 47     | 1.61 (1.24–2.10)       | 0.0004   | 1.00 (0.60–1.67)  | 0.99     |
| With proteinuria         | 246     | 15     | 1.24 (0.75–2.06)       | 0.41     | 2.33 (0.75–7.21)  | 0.14     |
| Cardiovascular events    |         |        |                        |          |                   |          |
| All                      | 2962    | 183    | 1.43 (1.25–1.63)       | <0.0001  | 0.98 (0.78–1.24)  | 0.89     |
| Without proteinuria      | 2716    | 145    | 1.43 (1.23–1.65)       | <0.0001  | 1.03 (0.80–1.34)  | 0.81     |
| With proteinuria         | 246     | 38     | 1.34 (0.96–1.86)       | <0.084   | 0.74 (0.44–1.25)  | 0.27     |

eGFR is the glomerular filtration rate estimated from the Chronic Kidney Disease Epidemiology Collaboration equation (CKD-EPI), as given in reference 17. Hazard ratios, presented with 95% confidence interval (CI), express the risk associated with a 1-SD increase in 24-h systolic blood pressure or a 1-SD decrease in eGFR. For eGFR, the inverse of the hazard ratio is presented, so that higher values, associated with lower eGFR, reflect higher risk. See Methods for the definition of proteinuria. All models were adjusted for center, sex, age, body mass index, smoking and drinking, serum cholesterol, diabetes mellitus, history of cardiovascular disease, and antihypertensive treatment and include both the 24-h systolic blood pressure or eGFR.
